# Supplementary material for: Atrial Fibrillation and Early Vascular Aging: Clinical Implications, Methodology Issues and Open Questions—A Review from the VascAgeNet COST Action
Source: MDPI journal article supplement (doi:10.3390/jcm13051207), 2024-02-20
Supplement: s1 [file s1]

**Table S1.** Narrative review checklist (From [https://legacyfileshare.elsevier.com/promis\\_misc/ANDJ%20Narrative%20Review%20Checklist.pdf](https://legacyfileshare.elsevier.com/promis_misc/ANDJ%20Narrative%20Review%20Checklist.pdf)).

| Section/Topic             | # | Checklist Item                                                                                                                                                                                         | Reported on Page |
|---------------------------|---|--------------------------------------------------------------------------------------------------------------------------------------------------------------------------------------------------------|------------------|
| <b>TITLE</b>              |   |                                                                                                                                                                                                        |                  |
| Title                     | 1 | Identify the report as a narrative review                                                                                                                                                              | 1                |
| <b>ABSTRACT</b>           |   |                                                                                                                                                                                                        |                  |
| Unstructured summary      | 2 | Provide an unstructured summary, including, as applicable: background. Objective, brief summary of narrative review and implications for future research, and clinical practice or policy development. | 1                |
| <b>INTRODUCTION</b>       |   |                                                                                                                                                                                                        |                  |
| Rationale/background      | 3 | Describe the rationale for the review in the context of what is already known.                                                                                                                         | 2                |
| Objectives                | 4 | Specify the key question(s) for the review topic.                                                                                                                                                      | 3                |
| <b>METHODS</b>            |   |                                                                                                                                                                                                        |                  |
| Research selection        | 5 | Specify the process for identifying the literature search (e.g., years considered, language, publication status, study design, and databases of coverage).                                             | 5                |
| <b>DISCUSSION/SUMMARY</b> |   |                                                                                                                                                                                                        |                  |
| Narrative                 | 6 | Discuss: (1) research reviewed, including fundamental or key findings, (2) limitations and/or quality of research reviewed, and (3) need for future research.                                          | 6-17             |
| Summary                   | 7 | Provide and overall interpretation of the narrative review in the context of clinical practice for health professionals, policy development and implementation, or future research.                    | 18-19            |
